# Supplementary material for: The filter loading effect by ambient aerosols in filter absorption photometers depends on the mixing state of the sampled particles
Source: Copernicus journal article supplement (doi:10.5194/amt-2016-285), 2016-10-13
Supplement: Supplementary file 1 [file amt-2016-285-supplement.pdf]

*Supplement of*

**The filter loading effect by ambient aerosols in filter absorption photometers depends on the mixing state of the sampled particles**

5

**Drinovec et al.**

*Correspondence to:* Luka Drinovec (luka.drinovec@aerosol.si) & Griša Močnik (grisa.mocnik@aerosol.si)

10

## S.1 Filter loading effect during intensive campaigns in Paris and Payerne

- 15 Filter loading effect parameter  $k$  was measured during Paris and Payerne EMEP campaigns (summer 2012, winter 2013) using the Aethalometer model AE33 (Figure S1). Its biggest variation occurs for the long wavelength channels (6 & 7,880 nm and 950 nm). There are some short-term variations and some longer stable periods which can last for several days (see Figure S1).

20

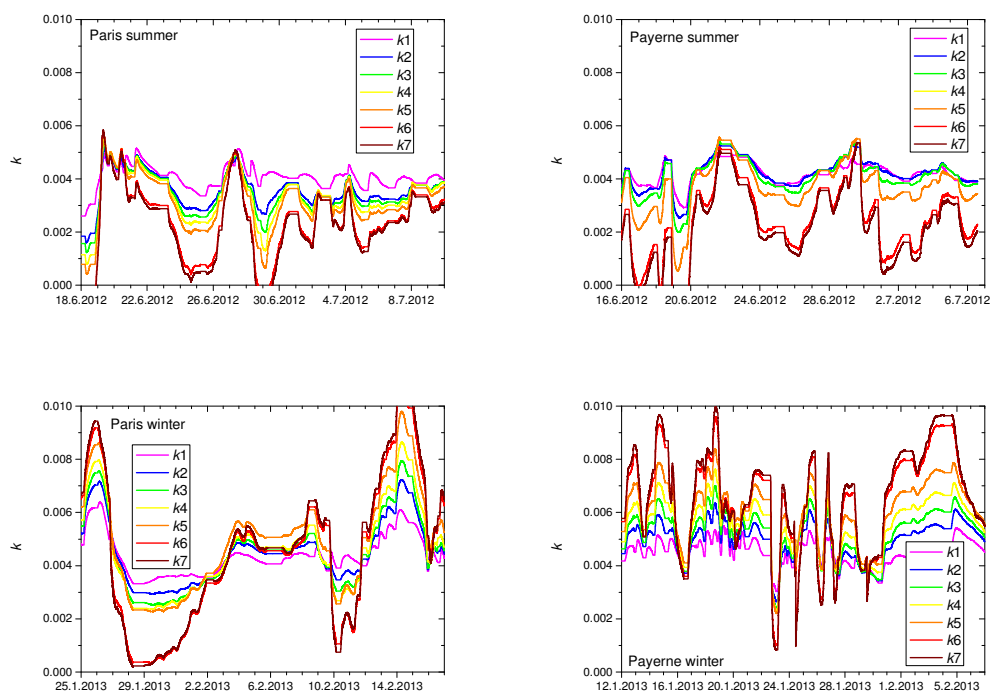

**Figure S1: Time trend of filter loading effect parameter  $k$  as measured by Aethalometer model AE33 during EMEP campaigns in Paris and Payerne.**

25

## S.2 Mixing state during intensive campaigns in Paris

Particle mobility diameter in Paris was measured using a TSI SMPS with Electrostatic classifier model 3081 and Condensation particle counter model 3775. The peak position (*Mode*) of the particle number size distribution was determined using TSI Aerosol Instrument Manager software. During summer, there is an evident increase of the particle size with increasing coating factor, which indicates that aerosols are internally mixed. During winter, there is an increase of particle size with  $CF < 12$ ; for bigger coating factors, the particle size does not increase as expected for externally mixed aerosols.

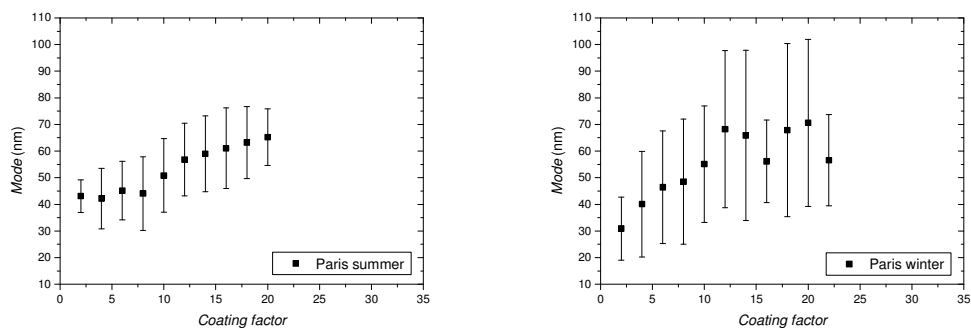

35

**Figure S2: Peak position (*Mode*) of the number size distribution during the intensive campaigns in Paris. Hourly data are averaged into coating factor ( $CF$ ) bins of 2 units wide. The error bars represent the standard deviation for data points inside each bin.**

### S.3 Effect of thermo-denuder on particle size distribution

40 The effect of the thermo-denuder was evaluated for the ambient sample from Ljubljana, before the campaign (Figure S3). With the thermo-denuder switched on, we measured the peak of the number size distribution at 60 nm. The particle number dropped for particles larger than 200 nm in mobility diameter. The thermo-denuder heated to 300° C caused a reduction of particle size, which is most evident for particles larger than 100 nm. There is an increase in particles number smaller than 30 nm when the denuder is switched on compared to when  
45 it is switched off. The total particle number was reduced by 40 %.

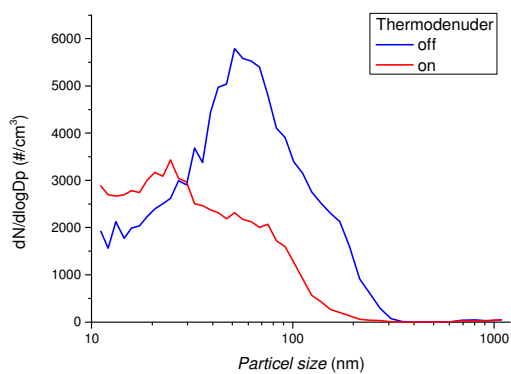

**Figure S3: Particle size number distribution for ambient aerosols in Ljubljana with the thermo-denuder turned off and on (300° C).**

#### S.4 Black carbon concentration and particle size distribution during the Ljubljana campaign SEM sampling

50

29<sup>th</sup> August 2014 was selected as a typical Ljubljana campaign day because of the stable sunny weather conditions. Scanning electron microscopy (SEM) samples were obtained in the middle of afternoon when the black carbon concentration was reduced due to vertical mixing (Figure S4, A): an ambient sample was taken at 15h (red dashed line), a thermo-denuded sample at 16h (green dashed line). The particle size distribution showed fresh emissions in the early morning and evening with mean particle size of approximately 50 nm (Figure S4, B). During the afternoon, larger particles with the peak above 100 nm are measured (Figure S4, C). Impactor stage 4 (with a size range of 170 – 260 nm) samples were analyzed in the main part of the article.

60 A

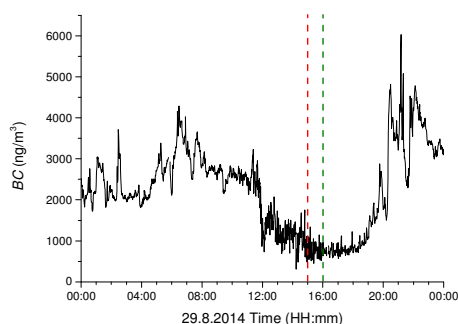

B

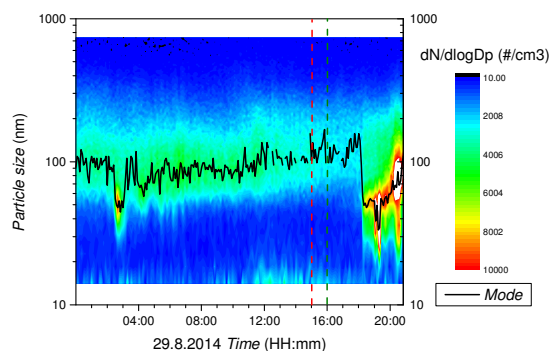

C

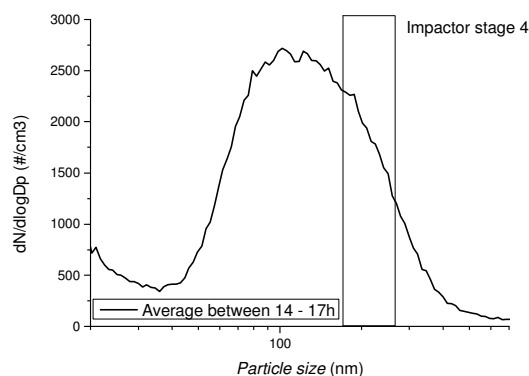

65 **Figure S4: Measurements of black carbon mass concentration (panel A) and particle size distribution (panel B) for 29 August 2014 are presented. Red and green dashed lines represent sampling times for ambient and thermo-denuded sample. Panel C shows the average particle size distribution between 14 – 17h and the estimated size of particles collected on impactor stage 4.**
